# Supplementary material for: Extrusion-driven metabolic shifts in composite flour from coffee and plantain byproducts
Source: Royal Society of Chemistry journal article supplement (doi:10.1039/d5fb00698h), 2025-12-03
Supplement: d5fb00698h1.xlsx [file d5fb00698h1.xlsx]

## Sheet: Table S1
Table S1. Details of the metabolites significantly affected in coffee and plantain by-product flours using gas chromatography–time-of-flight mass and liquid chromatography–time-of-flight mass spectrometry
Compound	Formula	Mass	RT (min)	Adduct	aCV for QC (%)	bID Level	Analytical platform	DET	cFold Change	dp value	eVIP
Amino Acids & Derivatives
Asparagine	C₄H₈N₂O₃	132.054	0.57	[M-H]-	2.3399	2	GM-RP-LC-QTOF-MS	ESI -	1.10401	4.98E-02ⱡ	-
Glutamine	C₅H₁₀N₂O₃	146.069	0.58	[M-H]-	3.32409	2	GM-RP-LC-QTOF-MS	ESI -	0.641518	5.13E-04ⱡ	1.14294
Homoproline methyl ester	C₇H₁₃NO₂	143.095	0.62	[M+H]+	12.7221	3	GM-RP-LC-QTOF-MS	ESI +	1.43963	1.99E-05ⱡ	1.18779
Pyroglutamic acid	C₅H₇NO₃	129.043	0.92	[M-H]-	1.66009	3	GM-RP-LC-QTOF-MS	ESI -	1.18978	2.66E-02ⱡ	-
Isoleucine	C₆H₁₃NO₂	131.095	1.26	[M-H]-	2.39258	3	GM-RP-LC-QTOF-MS	ESI -	0.382004	1.92E-06ⱡ	1.24348
Tryptophan	C₁₁H₁₂N₂O₂	204.09	3.93	[M-H]-	1.59518	2	GM-RP-LC-QTOF-MS	ESI -	0.330193	5.09E-06ⱡ	1.23232
Ethanolamine	C₂H₇NO	61.0528	10.059	-	26.5968	1	GC-QTOF-MS	ESI +	59.6398	2.97E-04*	1.37389
Glycine	C₂H₅NO₂	75.032	10.637	-	18.3745	1	GC-QTOF-MS	ESI +	7.05558	5.83E-04*	1.33365
Cycloleucine	C₆H₁₁NO₂	129.079	11.344	-	13.7912	1	GC-QTOF-MS	ESI +	0.450286	1.91E-02*	1.08909
Glutamic Acid	C₅H₉NO₄	147.053	13.446	-	8.14119	1	GC-QTOF-MS	ESI +	0.311188	6.02E-05*	1.40522
Glucosamine-Phosphate	C₆H₁₄NO₈P	259.046	16.619	-	16.7407	1	GC-QTOF-MS	ESI +	0.384478	2.26E-03*	1.28845
Galactosamine	C₆H₁₃NO₅	179.079	17.232	-	18.1821	1	GC-QTOF-MS	ESI +	0.0687698	3.06E-04*	1.34149
Tyramine	C₈H₁₁NO	137.084	17.789	-	21.6735	1	GC-QTOF-MS	ESI +	29.5893	2.70E-03*	1.27214
Glucosaminic Acid	C₆H₁₃NO₆	195.074	18.567	-	21.8629	1	GC-QTOF-MS	ESI +	0.111933	1.06E-02*	1.15371
Carbohydrates & derivates
2-Deoxy-Ribose	C₅H₁₀O₄	134.058	13.79	-	9.82229	1	GC-QTOF-MS	ESI +	0.415093	7.73E-03*	1.16534
Deoxyglucose	C₆H₁₂O₅	164.069	16.15	-	11.8788	1	GC-QTOF-MS	ESI +	0.406624	1.04E-03*	1.32638
1,5-Anhydrosorbitol	C₆H₁₂O₅	164.069	16.892	-	12.7744	1	GC-QTOF-MS	ESI +	0.00536662	0.027089	1.03705
Methyl-Galactopyranoside	C₇H₁₄O₆	194.079	16.992	-	13.9772	1	GC-QTOF-MS	ESI +	0.00342658	4.92E-03*	1.21096
Galactonic Acid	C₆H₁₂O₇	196.058	17.216	-	13.4904	1	GC-QTOF-MS	ESI +	0.0627734	1.37E-03*	1.29546
Sorbose	C₆H₁₂O₆	180.063	17.229	-	14.5301	1	GC-QTOF-MS	ESI +	0.0448716	7.67E-03*	1.17746
Galactose	C₆H₁₂O₆	180.063	17.235	-	12.2165	1	GC-QTOF-MS	ESI +	0.0552139	1.24E-02*	1.11797
Mannose	C₆H₁₂O₆	180.063	17.243	-	21.0534	1	GC-QTOF-MS	ESI +	0.0865049	1.24E-05*	1.42186
Sedoheptulose Anhydride Monohydrate	C₇H₁₄O₇	210.074	17.74	-	12.2984	1	GC-QTOF-MS	ESI +	0.0251314	6.72E-04*	1.32956
Glucose	C₆H₁₂O₆	180.063	17.83	-	19.0129	1	GC-QTOF-MS	ESI +	0.428204	1.52E-02*	1.10493
Glucoheptonic Acid	C₇H₁₄O₈	226.069	18.834	-	3.40521	1	GC-QTOF-MS	ESI +	0.387578	6.37E-05*	1.41386
Mucic Acid	C₆H₁₀O₈	210.038	18.885	-	19.3791	1	GC-QTOF-MS	ESI +	0.262308	5.81E-03*	1.20274
Erythritol	C₄H₁₀O₄	122.058	13.23	-	16.2935	1	GC-QTOF-MS	ESI +	0.541003	1.78E-02*	1.0889
Lipids
Azelaic acid	C₉H₁₆O₄	188.105	8.82	[M-H]-	2.65421	2	GM-RP-LC-QTOF-MS	ESI -	0.827324	8.68E-03ⱡ	1.00158
Dodecanedioic acid	C₁₂H₂₂O₄	230.152	13.01	[M-H]-	3.5066	3	GM-RP-LC-QTOF-MS	ESI -	0.8424	3.27E-02ⱡ	-
5,8,11-trihydroxyoctadec-9-enoic acid	C₁₈H₃₄O₅	330.241	13.62	[M-H]-	4.06459	3	GM-RP-LC-QTOF-MS	ESI -	0.760605	8.74E-04ⱡ	1.12266
5,8,12-Trihydroxy-9-octadecenoic acid	C₁₈H₃₄O₅	330.241	13.69	[M+Na]+	9.08944	3	GM-RP-LC-QTOF-MS	ESI -	0.559573	7.23E-04ⱡ	1.1092
9,12,13-trihydroxyoctadec-15-enoic acid	C₁₈H₃₄O₅	330.241	13.86	[M-H]-	7.79835	3	GM-RP-LC-QTOF-MS	ESI -	0.745237	9.37E-03ⱡ	-
9,12,13-trihydroxyoctadec-10-enoic acid	C₁₈H₃₄O₅	330.241	14.14	[M-H]-	3.94231	3	GM-RP-LC-QTOF-MS	ESI -	0.696492	2.41E-03ⱡ	1.08319
FA 18:4;O2	C₁₈H₂₈O₄	308.199	14.24	[M-H]-	2.87618	2	GM-RP-LC-QTOF-MS	ESI -	0.714829	5.55E-04ⱡ	1.14534
Myristoyl-EA	C₁₆H₃₃NO₂	271.251	14.77	[M+H]+	1.62492	3	GM-RP-LC-QTOF-MS	ESI +	2.41891	4.47E-02ⱡ	-
FA 18:1;O2 isomero 1	C₁₈H₃₄O₄	314.246	15.54	[M-H]-	1.95046	3	GM-RP-LC-QTOF-MS	ESI -	0.701067	4.47E-05ⱡ	1.2029
FA 18:1;O2 isomero 2	C₁₈H₃₄O₄	314.246	15.75	[M-H]-	0.835679	3	GM-RP-LC-QTOF-MS	ESI -	0.681875	3.60E-04ⱡ	1.15186
18-hydroxy-9,10-epoxy-stearic acid	C₁₈H₃₄O₄	314.246	15.83	[M+H-H2O]+	4.79866	2	GM-RP-LC-QTOF-MS	ESI +	0.515989	2.38E-04ⱡ	1.13936
9-HOTrE	C₁₈H₃₀O₃	294.219	16.42	[M-H]-	2.01574	2	GM-RP-LC-QTOF-MS	ESI -	0.822797	1.01E-04ⱡ	1.18955
FA 13:3;O	C₁₃H₂₀O₃	224.141	16.52	[M-H]-	3.75052	2	GM-RP-LC-QTOF-MS	ESI -	0.804736	2.77E-03ⱡ	1.06931
Linolenic acid isomero 1	C₁₈H₃₀O₂	278.225	17.25	[M+H]+	3.61649	2	GM-RP-LC-QTOF-MS	ESI +	0.672782	5.76E-05ⱡ	1.17008
FA 18:3;O	C₁₈H₃₀O₃	294.219	17.56	[M+H-H2O]+	8.53827	3	GM-RP-LC-QTOF-MS	ESI +	0.712638	2.46E-04ⱡ	1.1391
2-Linoleoyl Glycerol	C₂₁H₃₈O₄	354.277	17.59	[M+H]+	4.61196	2	GM-RP-LC-QTOF-MS	ESI +	0.593661	1.30E-05ⱡ	1.18886
Margaric acid	C₁₇H₃₄O₂	270.256	18.48	[M+H]+	3.77101	3	GM-RP-LC-QTOF-MS	ESI -	0.297951	4.20E-06ⱡ	1.23587
Linoleoyl Ethanolamide	C₂₀H₃₇NO₂	323.282	18.62	[M-H]-	2.71647	3	GM-RP-LC-QTOF-MS	ESI +	0.810532	5.58E-03ⱡ	1.0049
Linolenic acid isomero 2	C₁₈H₃₀O₂	278.225	19.51	[M-H]-	1.1482	3	GM-RP-LC-QTOF-MS	ESI -	1.21695	3.36E-03ⱡ	1.07442
Linoelaidic acid	C₁₈H₃₂O₂	280.24	20.36	[M-H]-	4.95525	3	GM-RP-LC-QTOF-MS	ESI -	1.36447	1.42E-04ⱡ	1.18921
Stearamide	C₁₈H₃₇NO	283.288	21.56	[M+H]+	4.49439	3	GM-RP-LC-QTOF-MS	ESI +	1.45169	1.53E-03ⱡ	1.07324
LPI 18:3 isomero 1	C₂₇H₄₇O₁₂P	594.28	15.14	[M-H]-	1.28353	3	GM-RP-LC-QTOF-MS	ESI -	0.715142	2.24E-04ⱡ	1.17819
LPI 18:3 isomero 2	C₂₇H₄₇O₁₂P	594.28	15.37	[M-H]-	1.40473	2	GM-RP-LC-QTOF-MS	ESI -	0.523102	5.00E-06ⱡ	1.23664
LPC 18:3	C₂₆H₄₈NO₇P	517.316	15.97	[M+H]+	3.62749	2	GM-RP-LC-QTOF-MS	ESI +	0.49807	5.46E-06ⱡ	1.19659
LPI 18:2	C₂₇H₄₉O₁₂P	596.296	16.02	[M-H]-	1.57374	3	GM-RP-LC-QTOF-MS	ESI -	0.537681	1.92E-06ⱡ	1.24447
Hexosyl LPE 18:2	C₂₉H₅₄NO₁₂P	639.338	16.14	[M-H]-	0.925314	2	GM-RP-LC-QTOF-MS	ESI -	0.470559	5.98E-06ⱡ	1.23024
LPG 15:0	C₂₁H₄₃O₉P	470.264	16.26	[M-H]-	1.94735	3	GM-RP-LC-QTOF-MS	ESI -	0.417397	1.02E-05ⱡ	1.2242
LPE 18:2 isomero 1	C₂₃H₄₄NO₇P	477.286	16.29	[M-H]-	5.41113	2	GM-RP-LC-QTOF-MS	ESI -	0.668628	1.09E-04ⱡ	1.18861
LPA 18:3 isomero 1	C₂₁H₃₇O₇P	432.228	16.32	[M-H]-	10.1633	2	GM-RP-LC-QTOF-MS	ESI -	0.680663	2.32E-04ⱡ	1.17605
LPC 18:2 isomero 1	C₂₆H₅₀NO₇P	519.332	16.34	[M+HCOOH-H]+	1.90919	3	GM-RP-LC-QTOF-MS	ESI +	0.837824	5.55E-04ⱡ	1.1425
LPC 18:2 isomero 2	C₂₆H₅₀NO₇P	519.332	16.44	[M+H]+	5.47984	2	GM-RP-LC-QTOF-MS	ESI +	0.51212	9.80E-06ⱡ	1.18932
LPE 18:2 isomero 2	C₂₃H₄₄NO₇P	477.286	16.49	[M-H]-	1.55886	2	GM-RP-LC-QTOF-MS	ESI -	0.74883	5.10E-05ⱡ	1.20436
LPA 18:3 isomero 2	C₂₁H₃₇O₇P	432.228	16.52	[M-H]-	6.34072	2	GM-RP-LC-QTOF-MS	ESI -	0.780258	1.64E-04ⱡ	1.1839
LPE 16:0 isomero 1	C₂₁H₄₄NO₇P	453.286	16.73	[M-H]-	1.86358	2	GM-RP-LC-QTOF-MS	ESI -	0.655096	8.22E-06ⱡ	1.2271
LPC 16:0	C₂₄H₅₀NO₇P	495.332	16.9	[M+H]+	6.09178	2	GM-RP-LC-QTOF-MS	ESI +	0.650568	7.52E-04ⱡ	1.10103
LPE 16:0 isomero 2	C₂₁H₄₄NO₇P	453.286	16.99	[M-H]-	1.21745	2	GM-RP-LC-QTOF-MS	ESI -	0.682252	5.90E-06ⱡ	1.23146
LPC 18:1	C₂₆H₅₂NO₇P	521.348	17.28	[M+H]+	2.50974	2	GM-RP-LC-QTOF-MS	ESI +	0.574169	1.89E-04ⱡ	1.14338
LPA 16:0	C₁₉H₃₉O₇P	410.243	18.07	[M-H]-	5.25204	2	GM-RP-LC-QTOF-MS	ESI -	0.792687	9.12E-03ⱡ	1.00416
LPC 18:0	C₂₆H₅₄NO₇P	523.364	18.37	[M+H]+	6.39595	2	GM-RP-LC-QTOF-MS	ESI +	0.667801	6.42E-04ⱡ	1.10412
Palmitic Acid	C₁₆H₃₂O₂	256.24	18.931	-	19.6185	1	GC-QTOF-MS	ESI +	0.658328	0.028141	1.03512
Dehydrophytosphingosine	C₁₈H₃₇NO₃	315.277	15.32	[M+H]+	2.10781	2	GM-RP-LC-QTOF-MS	ESI +	0.520816	4.01E-05ⱡ	1.17569
Phytosphingosine	C₁₈H₃₉NO₃	317.293	15.77	[M+H]+	1.72035	2	GM-RP-LC-QTOF-MS	ESI +	0.509715	8.03E-06ⱡ	1.19366
Sphinganine	C₁₈H₃₉NO₂	301.298	16.53	[M+H]+	1.60841	2	GM-RP-LC-QTOF-MS	ESI +	0.524662	5.75E-06ⱡ	1.19903
Cyperone	C₁₅H₂₂O	218.167	16.85	[M+H]+	1.00301	3	GM-RP-LC-QTOF-MS	ESI +	0.598473	5.42E-06ⱡ	1.19818
Ceratodictyol	C₁₉H₃₈O₄	330.277	18.23	[M+H]+	5.37094	2	GM-RP-LC-QTOF-MS	ESI +	0.558943	1.09E-03ⱡ	1.09445
Ursolic acid	C₃₀H₄₈O₃	456.36	19.12	[M+H-H2O]+	8.46626	2	GM-RP-LC-QTOF-MS	ESI +	0.398711	5.72E-03ⱡ	1.00771
Corosolic acid	C₃₀H₄₈O₄	472.355	21.65	[M-H]-	4.48919	3	GM-RP-LC-QTOF-MS	ESI -	0.364356	4.24E-05ⱡ	1.20946
Phenolic compounds
Procyanidin B1	C₃₀H₂₆O₁₂	578.142	5.46	[M-H]-	2.45835	2	GM-RP-LC-QTOF-MS	ESI -	0.120363	2.37E-06ⱡ	1.24208
Catechin	C₁₅H₁₄O₆	290.079	6.05	[M-H]-	1.73895	2	GM-RP-LC-QTOF-MS	ESI -	0.559403	5.83E-04ⱡ	1.14373
Procyanidin C1	C₄₅H₃₈O₁₈	866.206	6.74	[M-H]-	19.8382	3	GM-RP-LC-QTOF-MS	ESI -	0.106312	3.05E-05ⱡ	1.21381
Rutin	C₂₇H₃₀O₁₆	610.153	7.54	[M-H]-	5.98447	2	GM-RP-LC-QTOF-MS	ESI -/+	0.424749	2.28E-05ⱡ	1.22043
Kaempferol 3-O-rhamnoside-7-O-glucoside	C₂₇H₃₀O₁₅	594.159	8.43	[M-H]-	3.38335	2	GM-RP-LC-QTOF-MS	ESI +	0.570053	5.08E-03ⱡ	1.01418
Kaempferol-7-o-glucoside	C₂₁H₂₀O₁₁	448.101	8.62	[M-H]-	2.35933	3	GM-RP-LC-QTOF-MS	ESI -	0.565957	2.75E-03ⱡ	1.08423
Quercetin	C₁₅H₁₀O₇	302.043	10.9	[M-H]-	9.0414	2	GM-RP-LC-QTOF-MS	ESI -	6.7258	1.60E-05ⱡ	1.22003
Liquiritin	C₂₁H₂₂O₉	418.126	11	[M-H]-	1.17237	2	GM-RP-LC-QTOF-MS	ESI -	0.762603	5.91E-03ⱡ	1.03563
Umbelliferone	C₉H₆O₃	162.032	4.94	[M+H]+	2.67265	3	GM-RP-LC-QTOF-MS	ESI -/+	0.562702	4.69E-03ⱡ	1.00786
Herniarin	C₁₀H₈O₃	176.047	6.46	[M+H]+	2.18304	2	GM-RP-LC-QTOF-MS	ESI +	0.428598	4.25E-04ⱡ	1.11639
Cinnamic acid	C₉H₈O₂	148.052	6.95	[M+H]+	2.97011	2	GM-RP-LC-QTOF-MS	ESI +	0.505024	1.37E-04ⱡ	1.15412
5-Caffeoylquinic acid	C₁₆H₁₈O₉	354.095	3.87	[M-H]-	4.65739	2	GM-RP-LC-QTOF-MS	ESI -	0.462409	3.57E-03ⱡ	1.0654
Chlorogenic acid	C₁₆H₁₈O₉	354.095	4.91	[M-H]-	2.54221	2	GM-RP-LC-QTOF-MS	ESI +	0.397104	1.97E-03ⱡ	1.09686
Caffeoylquinic acid	C₁₆H₁₈O₉	354.095	4.94	[M+H]+	3.37075	2	GM-RP-LC-QTOF-MS	ESI +	0.754087	4.69E-02ⱡ	-
Coumaroyl quinic acid	C₁₆H₁₈O₈	338.1	5.88	[M-H]-	2.77344	2	GM-RP-LC-QTOF-MS	ESI -	0.380747	1.56E-04ⱡ	1.18522
4-Feruloylquinic acid	C₁₇H₂₀O₉	368.111	6.44	[M-H]-	3.15267	3	GM-RP-LC-QTOF-MS	ESI -	0.462095	8.81E-04ⱡ	1.13043
Dicaffeoylquinic acid	C₂₅H₂₄O₁₂	516.127	8.44	[M-H]-	2.83019	2	GM-RP-LC-QTOF-MS	ESI -	0.429506	2.69E-03ⱡ	1.08145
Organic acids
Gulonic acid	C₆H₁₂O₇	196.058	0.61	[M-H]-	1.40794	2	GM-RP-LC-QTOF-MS	ESI -	1.5415	7.32E-06ⱡ	1.23063
Methoxycinnamaldehyde	C₁₀H₁₀O₂	162.068	1.19	[M+H]+	10.6639	2	GM-RP-LC-QTOF-MS	ESI +	2.11052	6.76E-05ⱡ	1.1623
2-Methyl-6,7-dihydroxy-1,2,3,4-tetrahydroisomeroquinoline	C₁₀H₁₃NO₂	179.095	1.2	[M+H]+	2.12645	2	GM-RP-LC-QTOF-MS	ESI +	1.8307	9.04E-04ⱡ	1.09326
2-Furoic Acid	C₅H₄O₃	112.016	8.074	-	19.8592	1	GC-QTOF-MS	ESI +	2.68161	2.23E-03*	1.28448
Malonic Acid	C₃H₄O₄	104.011	9.13	-	22.3765	1	GC-QTOF-MS	ESI +	0.452062	0.038589	-
Fumaric Acid	C₄H₄O₄	116.011	11.083	-	11.0206	1	GC-QTOF-MS	ESI +	0.335246	0.024709	1.05108
Hydroxyhexanoic Acid	C₆H₁₂O₃	132.079	11.823	-	17.7335	1	GC-QTOF-MS	ESI +	0.31384	1.31E-03*	1.30019
Malic Acid	C₄H₆O₅	134.022	13.028	-	14.0621	1	GC-QTOF-MS/GM-RP-LC-QTOF-MS	ESI +/-	0.320575	2.72E-04*	1.36768
Hydroxyglutaric Acid	C₅H₈O₅	148.037	14.065	-	11.5433	1	GC-QTOF-MS	ESI +	0.282373	3.00E-03*	1.23651
Aconitic Acid	C₆H₆O₆	174.016	16.017	-	11.5216	1	GC-QTOF-MS	ESI +	0.438215	3.17E-04*	1.34996
Dihydroxybenzoic Acid	C₇H₆O₄	154.027	16.815	-	13.3821	1	GC-QTOF-MS	ESI +	0.316908	3.95E-05*	1.41955
Quinic Acid	C₇H₁₂O₆	192.063	17.415	-	8.44809	1	GC-QTOF-MS	ESI +	0.23257	7.00E-05*	1.39791
Gluconic Acid Lactone	C₆H₁₀O₆	178.048	17.556	-	16.5921	1	GC-QTOF-MS	ESI +	0.408828	0.033661	1.01245
Glucuronolactone	C₆H₈O₆	176.032	17.82	-	18.6738	1	GC-QTOF-MS	ESI +	0.464749	0.038969	-
Gallic Acid	C₇H₆O₅	170.022	18.26	-	8.90708	1	GC-QTOF-MS	ESI +	0.264865	3.43E-07*	1.46611
Shikimic Acid	C₇H₁₀O₅	174.053	20.6091	-	15.4907	1	GC-QTOF-MS	ESI +	0.134687	3.38E-05*	1.41493
Organic nitrogen compounds
Acetylindole	C₁₀H₉NO	159.068	2.11	[M+H]+	12.8018	3	GM-RP-LC-QTOF-MS	ESI +	0.504364	2.54E-03ⱡ	1.05707
Pantothenate	C₉H₁₇NO₅	219.111	3	[M-H]-	5.17576	2	GM-RP-LC-QTOF-MS	ESI -	0.408198	1.92E-06ⱡ	1.24345
2,5-Dihydroxybenzaldehyde	C₇H₆O₃	138.032	4.03	[M-H]-	2.04754	3	GM-RP-LC-QTOF-MS	ESI -	2.52072	2.53E-05ⱡ	1.2123
3-Methylxanthine	C₆H₆N₄O₂	166.049	0.61	[M-H]-	3.48999	3	GM-RP-LC-QTOF-MS	ESI -	1.58251	2.32E-05ⱡ	1.21494
Trigonelline	C₇H₇NO₂	137.048	0.62	[M+H]+	2.33345	2	GM-RP-LC-QTOF-MS	ESI +	1.25769	7.67E-04ⱡ	1.10684
Caffeine	C₈H₁₀N₄O₂	194.08	17.1	-	13.66	1	GC-QTOF-MS/ GM-RP-LC-QTOF-MS	ESI +	0.530096	2.81E-03*	1.2561
Benzenoids and others Metabolites
Phenylacetic acid	C₈H₈O₂	136.052	0.98	[M+H]+	4.8945	2	GM-RP-LC-QTOF-MS	ESI +	0.600745	1.96E-04ⱡ	1.14377
Phenylacetaldehyde	C₈H₈O	120.058	1.34	[M+H]+	8.93242	2	GM-RP-LC-QTOF-MS	ESI +	0.700549	9.04E-04ⱡ	1.10167
Benzene-1,2,4-triol	C₆H₆O₃	126.032	1.62	[M-H]-	1.68953	3	GM-RP-LC-QTOF-MS	ESI -	0.705059	4.96E-03ⱡ	1.04593
2,3-Dihydroxybenzoic acid	C₇H₆O₄	154.027	2.99	[M-H]-	1.59886	2	GM-RP-LC-QTOF-MS	ESI -	0.73194	1.06E-02ⱡ	-
Naphthylamine	C₁₀H₉N	143.073	3.98	[M+H]+	1.41661	2	GM-RP-LC-QTOF-MS	ESI +	0.340869	4.79E-06ⱡ	1.19989
Benzoic acid	C₇H₆O₂	122.037	5.2	[M-H]-	1.3466	2	GM-RP-LC-QTOF-MS	ESI -	1.93528	2.32E-05ⱡ	1.21601
3-Methylbenzoic acid	C₈H₈O₂	136.052	5.26	[M-H]-	1.80605	3	GM-RP-LC-QTOF-MS	ESI -	1.36693	2.09E-02ⱡ	-
Phosphoric Acid	H₃O₄P	97.9769	10.178	-	10.9179	1	GC-QTOF-MS	ESI +	0.364922	2.88E-03*	1.2416
Adenosine	C₁₀H₁₃N₅O₄	267.097	1.51	[M+H]+	15.9542	2	GM-RP-LC-QTOF-MS	ESI +	1.78269	5.20E-05ⱡ	1.16567
Adenine	C₅H₅N₅	135.054	4.13	[M+H]+	0.767067	2	GM-RP-LC-QTOF-MS	ESI +	0.806477	1.79E-02ⱡ	-
Indoleacrylic acid	C₁₁H₉NO₂	187.063	3.98	[M+H]+	2.75573	2	GM-RP-LC-QTOF-MS	ESI +	0.30984	4.32E-06ⱡ	1.20095
